# Supplementary material for: Persistent organic pollutants in Alaskan ringed seal (Phoca hispida) and walrus (Odobenus rosmarus) blubber
Source: Royal Society of Chemistry journal article supplement (doi:10.1039/b602379g), 2006-01-01
Supplement: b602379g.pdf [file b602379g.pdf]

## Ringed Seal Data

| NBSB Number*            | RGSL-002 | RGSL-005 | RGSL-006 | RGSL-010 | RGSL-023 | RGSL-025 | RGSL-028 | RGSL-048b | RGSL-054 | RGSL-055 | RGSL-047 | RGSL-049 | RGSL-050 | RGSL-051 | RGSL-052 | RGSL-053 | RGSL-037 |
|-------------------------|----------|----------|----------|----------|----------|----------|----------|-----------|----------|----------|----------|----------|----------|----------|----------|----------|----------|
| Collection Year         | 1988     | 1988     | 1988     | 1988     | 1991     | 1991     | 1991     | 1996      | 1996     | 1996     | 1996     | 1996     | 1996     | 1996     | 1996     | 1996     | 1994     |
| LIPID (mass fraction %) | 81.3     | 82.1     | 82.2     | 81.5     | 78.0     | 84.3     | 81.5     | 86.3      | 84.9     | 85.3     | 83.2     | 84.5     | 87.0     | 85.9     | 87.0     | 88.3     | 88.3     |
| GENDER                  | female    | female   | female   | male     |
| LOCAT                   | barrow    | barrow   | barrow   | barrow   | barrow   | barrow   | barrow   | barrow   | barrow   | barrow   |
| Blubber Thickness (cm)  | 2.5      | 2.7      | 2.8      | 3.0      | 2.3      | 2.5      | 2.0      | 1.8       | 2.0      | 2.4      | 3.5      | 2.9      | 2.8      | 2.9      | 1.9      | 1.9      | 3.2      |
| AGE (Yr)                | 0.5      | 1.0      | 0.5      | 2.0      | 5.5      | 1.5      | 9.0      | 7.0       | 5.0      | 5.0      | 7.0      | 7.0      | 6.0      | 7.0      | 5.0      | 6.0      | 8.0      |
| PCB 18                  | 5.40     | 3.94     | 4.53     | 3.86     | 3.25     | 1.86     | 2.71     | 7.18      | 5.94     | 4.66     | 7.89     | <4       | 4.32     | 3.23     | 9.58     | 4.20     | 1.41     |
| PCB 28                  | 17.04    | 15.37    | 19.34    | 13.85    | 14.97    | 20.12    | 18.86    | 11.65     | 9.32     | 11.80    | 35.51    | 8.96     | 18.19    | 18.32    | 14.92    | 11.00    | 10.55    |
| PCB 31                  | <4       | 5.70     | 6.20     | <4       | 5.52     | 11.46    | 4.16     | 8.98      | 8.00     | 5.68     | 12.03    | <4       | 7.30     | 9.71     | 11.41    | 8.32     | <4       |
| PCB 44                  | 4.15     | 2.71     | 5.85     | 2.61     | 4.20     | 2.55     | 2.41     | 2.14      | 2.30     | 1.95     | 4.08     | 0.80     | 3.37     | 3.33     | 2.66     | 2.02     | 1.45     |
| PCB 49                  | 9.76     | 6.10     | 13.83    | 8.98     | 7.62     | 5.01     | 13.22    | 4.69      | 6.27     | 5.19     | 7.56     | 2.08     | 14.33    | 18.62    | 6.82     | 11.03    | 4.75     |
| PCB 52                  | 44.20    | 35.00    | 46.92    | 34.90    | 29.23    | 26.04    | 46.11    | 15.29     | 16.52    | 17.73    | 35.55    | 13.17    | 63.99    | 52.23    | 20.22    | 60.79    | 17.88    |
| PCB 66                  | 24.51    | 20.28    | 24.99    | 12.03    | 10.75    | 30.39    | 15.70    | 7.67      | 6.66     | 6.64     | 44.90    | 8.84     | 7.57     | 14.26    | 16.32    | 7.70     | 13.58    |
| PCB 87                  | 17.76    | 10.70    | 17.55    | 12.19    | 9.23     | 7.65     | 19.08    | 5.24      | 6.18     | 6.75     | 12.26    | 3.27     | 10.55    | 14.54    | 6.72     | 6.52     | 9.42     |
| PCB 95                  | 10.52    | 6.10     | 13.82    | 10.21    | 6.51     | 4.42     | 10.51    | 5.44      | 5.33     | 4.23     | 6.43     | 1.50     | 21.95    | 14.53    | 6.82     | 12.43    | 5.61     |
| PCB 99                  | 67.72    | 69.27    | 44.04    | 76.62    | 54.26    | 58.10    | 77.47    | 17.50     | 20.00    | 39.10    | 104.00   | 42.90    | 147.60   | 66.90    | 52.80    | 141.89   | 26.46    |
| PCB 101+90              | 125.69   | 90.55    | 76.16    | 91.62    | 104.07   | 79.53    | 113.06   | 43.35     | 46.25    | 51.65    | 71.50    | 42.35    | 116.80   | 95.20    | 47.15    | 91.44    | 31.60    |
| PCB 105                 | 20.46    | 22.63    | 11.51    | 12.44    | 11.32    | 19.91    | 19.47    | 8.99      | 9.77     | 12.81    | 33.29    | 11.64    | 22.78    | 21.52    | 15.41    | 17.01    | 10.98    |
| PCB 110                 | 21.71    | 16.22    | 26.33    | 11.57    | 14.97    | 17.30    | 12.77    | 7.20      | 6.62     | 6.00     | 15.80    | 6.62     | 9.30     | 9.50     | 10.00    | 7.33     | 9.47     |
| PCB 118                 | 68.89    | 69.23    | 37.00    | 35.42    | 38.88    | 70.52    | 50.70    | 32.85     | 33.08    | 30.26    | 112.32   | 40.13    | 56.45    | 60.19    | 57.99    | 37.07    | 24.31    |
| PCB 128                 | 6.94     | 3.47     | 6.17     | 12.02    | 3.32     | 2.19     | 10.28    | 1.10      | 2.20     | 2.87     | <2.4     | 1.38     | 19.95    | 20.15    | 1.80     | 21.26    | <0.3     |
| PCB 138                 | 83.05    | 98.21    | 50.52    | 100.44   | 62.09    | 46.24    | 82.32    | 65.51     | 84.35    | 83.75    | 147.97   | 55.00    | 208.43   | 133.14   | 80.71    | 203.14   | 39.85    |
| PCB 149                 | 20.80    | 15.19    | 15.59    | 20.09    | 15.23    | 14.46    | 20.14    | 10.51     | 11.37    | 13.77    | 5.62     | 22.33    | 14.00    | 6.05     | 15.17    | 9.59     | 9.59     |
| PCB 151                 | 8.92     | 3.10     | 11.52    | 14.86    | 3.96     | 1.84     | 17.65    | 3.07      | 4.39     | 3.44     | 3.40     | <1       | <1       | <1       | 1.72     | 11.49    | 9.32     |
| PCB 153                 | 142.37   | 164.98   | 75.70    | 157.40   | 150.26   | 128.17   | 164.82   | 127.17    | 149.06   | 129.94   | 245.35   | 101.18   | 276.69   | 175.11   | 137.47   | 283.79   | 69.70    |
| PCB 156                 | 4.75     | 5.42     | 2.03     | 3.33     | 3.28     | 3.77     | 3.20     | 3.40      | 3.40     | 3.20     | 6.10     | 2.64     | 6.50     | 4.10     | 9.30     | 5.50     | 1.37     |
| PCB 170                 | 8.10     | 10.41    | 3.15     | 8.20     | 6.87     | 5.12     | 13.45    | 10.46     | 10.46    | 6.93     | 13.35    | 4.45     | 13.18    | 8.20     | 5.11     | 14.74    | 8.78     |
| PCB 180                 | 24.42    | 28.31    | 9.10     | 24.31    | 25.64    | 18.72    | 32.64    | 38.45     | 36.95    | 23.45    | 37.80    | 15.86    | 42.20    | 31.80    | 17.45    | 47.57    | 19.11    |
| PCB 183                 | 10.20    | 10.01    | 4.80     | 11.72    | 10.79    | 7.24     | 17.64    | 20.28     | 23.21    | 18.42    | 25.67    | 5.34     | 33.18    | 26.71    | 10.72    | 30.27    | 9.94     |
| PCB 187                 | 23.09    | 16.34    | 11.43    | 31.90    | 21.36    | 12.55    | 37.23    | 15.10     | 21.33    | 17.29    | 24.86    | 8.58     | 47.62    | 31.35    | 10.11    | 49.43    | 20.36    |
| PCB 194                 | 1.37     | 1.63     | 0.34     | 1.69     | 2.04     | 0.97     | 4.55     | 4.07      | 3.52     | 1.83     | 2.65     | 0.77     | 3.01     | 1.92     | 1.14     | 3.29     | 3.63     |
| PCB 195                 | 0.39     | 0.43     | <0.3     | 0.68     | 0.58     | <0.3     | 5.47     | 1.29      | 1.29     | 1.14     | 1.09     | <1       | 1.23     | 0.75     | 0.36     | 1.24     | 4.96     |
| PCB 206                 | <0.3     | 0.16     | <0.3     | 0.38     | 0.55     | <0.3     | 3.98     | 1.51      | 1.13     | 0.89     | 0.78     | <1       | 0.95     | 0.72     | <1       | 0.84     | 3.73     |
| PCB 209                 | <0.3     | <0.3     | <0.3     | <0.3     | <0.3     | <0.3     | <0.3     | 1.10      | 0.81     | <0.3     | <1.1     | <1       | 0.55     | 0.59     | <1       | <1       | <0.3     |
|                         |          |          |          |          |          |          |          |           |          |          |          |          |          |          |          |          |          |
|                         |          |          |          |          |          |          |          |           |          |          |          |          |          |          |          |          |          |
| HCB                     | 50.46    | 48.68    | 26.47    | 12.70    | 26.67    | 21.67    | 37.76    | 13.76     | 11.40    | 44.19    | 8.24     | 16.86    | 11.44    | 14.93    | 7.45     | 10.66    | 15.78    |
| a-HCH                   | 902.18   | 407.48   | 367.71   | 293.08   | 144.87   | 275.59   | 116.01   | 104.21    | 122.89   | 285.17   | 284.81   | 164.58   | 264.74   | 87.52    | 423.39   | 367.17   | 103.45   |
| b-HCH                   | 62.24    | 35.19    | 65.40    | 58.80    | 42.69    | 64.60    | NA       | NA        | NA       | 55.01    | 121.80   | NA       | NA       | 53.81    | 125.47   | 40.54    | 36.85    |
| g-HCH                   | 21.43    | 12.26    | 19.06    | 12.77    | 8.31     | 23.27    | 2.96     | 4.78      | 4.73     | 8.30     | 27.90    | 18.28    | 20.95    | 3.62     | 44.51    | 6.73     | 9.85     |
| cis-chlordane           | 13.21    | 4.98     | 27.05    | 20.72    | 4.69     | 32.16    | 1.81     | 2.68      | 3.09     | 3.99     | 3.74     | 28.60    | 19.02    | 1.49     | 29.80    | 1.68     | 19.02    |
| trans-chlordane         | 2.47     | 1.56     | 3.22     | 3.70     | 1.82     | 3.97     | 2.63     | 3.30      | 3.17     | 1.50     | 2.66     | 6.25     | 5.15     | 2.22     | 6.11     | 1.90     | 3.94     |
| oxychlordane            | 265.08   | 245.51   | 145.87   | 216.30   | 86.32    | 226.24   | 92.00    | 106.05    | 195.50   | 429.00   | 321.64   | 262.62   | 165.50   | 587.03   | 168.61   | 54.23    | 17.67    |
| cis-nonachlor           | 30.21    | 12.06    | 28.33    | 24.04    | 5.44     | 34.68    | 3.26     | 3.10      | 7.08     | 4.96     | 11.93    | 47.22    | 20.57    | 4.09     | 33.59    | 4.22     | 17.67    |
| trans-nonachlor         | 216.00   | 108.20   | 258.87   | 366.59   | 67.13    | 650.13   | 365.53   | 58.56     | 103.09   | 47.37    | 132.47   | 830.30   | 643.61   | 76.33    | 1080.44  | 55.01    | 216.67   |
| nonachlor III           | NA**     | 72.00    | 69.00    | 89.00    | NA       | NA       | 28.00    | 40.00     | 48.00    | NA       | NA       | 240.00   | 140.00   | 31.00    | NA       | 42.00    | NA       |
| heptachlor epoxide      | 72.12    | 50.08    | 67.78    | 69.41    | 23.88    | 98.02    | 23.30    | 30.19     | 39.30    | 32.47    | 73.61    | 190.01   | 101.89   | 33.09    | 221.73   | 34.70    | 30.93    |
| 2,4'-DDD                | <1.5     | <1.5     | <1.5     | <1.5     | <1.5     | <1.5     | <1.5     | <1.5      | <1.5     | <1.5     | <1.5     | <1.9     | 3.10     | 3.50     | <1.5     | <1.5     | <1.5     |
| 2,4'-DDE                | <1       | <1.5     | <1.5     | <1.5     | <1.5     | 5.90     | 5.60     | <1.5      | <1.5     | <1       | 1.40     | 1.70     | <1.5     | <1.5     | <1.5     | <1.5     | 5.66     |
| 2,4'-DDT                | 2.02     | <1.5     | 2.50     | <1.5     | <1.8     | <1.8     | 7.53     | 7.84      | 8.45     | <1.8     | 9.62     | 13.46    | 13.88    | 3.50     | 5.91     | <1.5     | 17.79    |
| 4,4'-DDD                | 15.26    | 38.30    | 9.82     | 17.00    | <1.2     | 21.23    | 5.33     | 4.00      | 4.81     | 6.79     | 8.81     | 10.53    | 6.27     | 3.62     | 4.88     | 2.90     | 7.17     |
| 4,4'-DDE                | 413.60   | 417.91   | 194.88   | 349.74   | 296.01   | 502.39   | 235.96   | 270.38    | 321.80   | 312.29   | 643.73   | 785.63   | 543.99   | 363.29   | 778.70   | 271.70   | 141.90   |
| 4,4'-DDT                | 195.62   | 196.24   | 66.39    | 60.14    | 43.41    | 112.13   | 24.36    | 21.26     | 30.11    | 67.34    | 79.00    | 75.67    | 32.81    | 18.88    | 90.40    | 46.01    | 28.90    |
| dieldrin                | 80.13    | 59.87    | 46.75    | 29.88    | 20.56    | 47.62    | 20.46    | 18.22     | 22.34    | 38.67    | 52.08    | 89.97    | 34.33    | 13.05    | 60.35    | 20.76    | 22.90    |
| mirex                   | 8.14     | 5.86     | 3.10     | 14.48    | 9.14     | 20.88    | 7.90     | 11.00     | 7.20     | 5.23     | NA       | 18.00    | 11.00    | 5.90     | 32.82    | 3.83     | 14.31    |

\*National Biomonitoring Specimen Bank operated by the National Institute of Standards and Technology  
 \*\*Not Available

## Ringed Seal Data

| NBSB Number*<br>Collection Year | RGSL-012 | RGSL-015 | RGSL-017 | RGSL-018 | RGSL-035 | RGSL-036 | RGSL-048a | RGSL-056 | RGSL-011 | RGSL-014 | RGSL-016 | RGSL-029 | RGSL-030 | RGSL-031 | RGSL-033 | RGSL-034 | RGSL-034 |
|---------------------------------|----------|----------|----------|----------|----------|----------|-----------|----------|----------|----------|----------|----------|----------|----------|----------|----------|----------|
|                                 | 1989     | 1989     | 1991     | 1991     | 1994     | 1994     | 1997      | 1997     | 1989     | 1989     | 1991     | 1993     | 1993     | 1993     | 1993     | 1994     | 1994     |
| LIPID (mass fraction %)         | 74.0     | 85.5     | 89.5     | 90.9     | 87.5     | 85.8     | 79.4      | 90.0     | 86.7     | 84.2     | 87.6     | 90.0     | 87.0     | 91.0     | 85.1     | 86.5     | 86.5     |
| GENDER                          | female    | female   | male     | male     | male     | female   | Male     | male     | male     | male     | male     |
| LOCAT                           | nome      | nome     | Nome     | Nome     | Nome     | Nome     | Nome     | Nome     | Nome     | Nome     | Nome     |
| Blubber Thickness (cm)          | 3.5      | 3.3      | 7.0      | 2.0      | 3.5      | 3.8      | 4.4       | 2.0      | 4.0      | 3.0      | 4.0      | 3.4      | 6.0      | 4.0      | 4.0      | 4.0      | 4.0      |
| AGE (Yr)                        | 2.0      | 0.5      |          | 1.0      |          |          |           | 4.0      | 1.0      | 1.0      | 0.5      |          |          |          |          |          |          |
| PCB 18                          | <4       | 1.53     | 3.45     | 2.34     | 2.08     | 2.64     | <4        | <4       | <1.7     | <1.4     | <1.1     | NA       | NA       | NA       | NA       | NA       | NA       |
| PCB 28                          | 5.77     | 11.12    | 16.65    | 12.31    | 9.26     | 13.16    | 8.81      | 7.26     | 9.90     | 7.60     | 8.70     | NA       | NA       | NA       | NA       | NA       | NA       |
| PCB 31                          | <4       | 3.00     | 3.79     | 5.19     | <4       | <4       | <4        | <4       | 4.20     | 2.30     | 1.30     | NA       | NA       | NA       | NA       | NA       | NA       |
| PCB 44                          | 6.90     | 1.55     | 5.22     | 3.24     | 1.79     | 5.74     | 3.49      | 3.10     | 2.00     | <1.4     | <1.1     | NA       | NA       | NA       | NA       | NA       | NA       |
| PCB 49                          | 1.66     | 4.45     | 2.97     | 7.65     | 4.39     | 6.61     | 2.63      | 1.90     | 5.00     | 2.60     | 1.90     | NA       | NA       | NA       | NA       | NA       | NA       |
| PCB 52                          | 10.84    | 18.23    | 16.57    | 20.48    | 16.85    | 31.50    | 11.67     | 9.27     | 19.00    | 13.00    | 9.10     | NA       | NA       | NA       | NA       | NA       | NA       |
| PCB 66                          | 3.52     | 8.22     | 19.53    | 13.66    | 15.37    | 11.67    | 11.43     | 4.56     | NR       | NR       | NR       | NA       | NA       | NA       | NA       | NA       | NA       |
| PCB 87                          | 1.63     | 4.62     | 3.59     | 4.41     | 3.58     | 14.67    | 3.63      | 2.18     | 8.10     | 5.70     | 4.30     | NA       | NA       | NA       | NA       | NA       | NA       |
| PCB 95                          | 1.75     | 3.31     | 2.24     | 6.49     | 4.25     | 6.82     | 2.05      | 2.08     | 4.90     | 3.00     | 1.70     | NA       | NA       | NA       | NA       | NA       | NA       |
| PCB 99                          | 18.74    | 31.99    | 42.67    | 28.17    | 31.98    | 44.06    | 19.06     | 23.37    | 28.00    | 43.00    | 29.00    | NA       | NA       | NA       | NA       | NA       | NA       |
| PCB 101+90                      | 47.67    | 29.20    | 35.19    | 19.02    | 21.22    | 66.02    | 22.44     | 31.71    | 41.00    | 42.00    | 30.00    | NA       | NA       | NA       | NA       | NA       | NA       |
| PCB 105                         | 3.03     | 7.95     | 16.83    | 7.56     | 9.22     | 10.88    | 7.98      | 7.23     | 7.60     | 9.60     | 7.80     | NA       | NA       | NA       | NA       | NA       | NA       |
| PCB 110                         | 3.79     | 7.31     | 9.67     | 9.44     | 8.60     | 11.98    | 6.87      | 4.47     | 9.60     | 6.40     | 5.70     | NA       | NA       | NA       | NA       | NA       | NA       |
| PCB 118                         | 19.72    | 22.91    | 51.38    | 24.62    | 32.62    | 31.05    | 20.29     | 16.70    | 23.00    | 24.00    | 21.00    | NA       | NA       | NA       | NA       | NA       | NA       |
| PCB 128                         | 2.35     | 4.66     | 6.13     | 10.29    | 8.31     | 5.17     | 1.30      | 1.30     | 3.80     | 2.20     | 1.60     | NA       | NA       | NA       | NA       | NA       | NA       |
| PCB 138                         | 38.41    | 40.55    | 61.47    | 29.00    | 31.31    | 56.31    | 25.84     | 32.25    | 41.00    | 65.00    | 34.00    | NA       | NA       | NA       | NA       | NA       | NA       |
| PCB 149                         | 3.58     | 7.57     | 6.99     | 7.60     | 5.78     | 13.54    | 5.20      | 4.74     | 6.60     | 8.10     | 4.50     | NA       | NA       | NA       | NA       | NA       | NA       |
| PCB 151                         | 1.09     | 2.92     | 1.25     | 6.37     | 5.20     | 8.98     | 3.37      | 2.64     | 5.60     | 2.30     | 1.30     | NA       | NA       | NA       | NA       | NA       | NA       |
| PCB 153                         | 87.57    | 71.61    | 148.30   | 55.04    | 72.27    | 87.36    | 38.53     | 57.80    | 60.00    | 100.00   | 54.00    | NA       | NA       | NA       | NA       | NA       | NA       |
| PCB 156                         | 1.60     | 1.74     | 3.29     | 1.51     | 1.99     | 1.80     | 0.69      | 1.06     | <1.7     | 2.80     | 1.50     | NA       | NA       | NA       | NA       | NA       | NA       |
| PCB 170                         | 4.48     | 2.95     | 11.35    | 2.01     | 2.93     | 6.17     | 3.90      | 4.82     | 2.70     | 5.40     | 1.80     | NA       | NA       | NA       | NA       | NA       | NA       |
| PCB 180                         | 17.47    | 8.64     | 28.67    | 6.91     | 9.50     | 14.15    | 7.02      | 11.23    | 7.40     | 14.00    | 4.90     | NA       | NA       | NA       | NA       | NA       | NA       |
| PCB 183                         | 5.73     | 3.73     | 8.08     | 3.43     | 4.14     | 9.12     | 4.81      | 5.71     | 3.30     | 4.70     | 2.00     | NA       | NA       | NA       | NA       | NA       | NA       |
| PCB 187                         | 8.08     | 7.87     | 15.11    | 8.13     | 8.31     | 20.10    | 9.04      | 10.52    | 8.20     | 8.50     | 3.60     | NA       | NA       | NA       | NA       | NA       | NA       |
| PCB 194                         | 1.99     | 0.77     | 3.11     | 0.61     | 0.82     | 2.91     | 2.34      | 2.40     | <1.7     | <1.4     | <1.1     | NA       | NA       | NA       | NA       | NA       | NA       |
| PCB 195                         | 0.70     | <1       | 4.12     | <0.3     | 0.44     | 4.83     | 4.64      | 4.13     | <1.7     | <1.4     | <1.1     | NA       | NA       | NA       | NA       | NA       | NA       |
| PCB 206                         | 1.51     | <1       | 3.83     | <0.3     | 0.40     | 3.53     | 3.41      | 3.00     | <1.7     | <1.4     | <1.1     | NA       | NA       | NA       | NA       | NA       | NA       |
| PCB 209                         | 0.48     | <1       | 5.00     | <0.3     | <0.3     | <1       | <1        | <1       | <1.7     | <1.4     | <1.1     | NA       | NA       | NA       | NA       | NA       | NA       |
|                                 |          |          |          |          |          |          |           |          |          |          |          |          |          |          |          |          |          |
| HCB                             | 20.29    | 12.13    | 22.46    | 24.51    | 15.56    | 27.48    | 13.52     | 10.74    | 25.00    | 23.00    | 32.00    | 50.00    | 7.00     | 13.00    | 15.00    | 21.00    | 21.00    |
| a-HCH                           | 71.40    | 319.03   | 129.36   | 130.95   | 129.64   | 184.23   | 93.54     | 73.72    | 140.00   | 300.00   | 110.00   | NA       | NA       | NA       | NA       | NA       | NA       |
| b-HCH                           | 17.98    | 50.18    | 56.12    | 27.27    | 32.38    | 97.00    | 57.20     | 37.86    | 31.00    | 56.00    | 48.00    | NA       | NA       | NA       | NA       | NA       | NA       |
| g-HCH                           | 5.04     | 16.69    | 8.04     | 13.38    | 9.28     | 7.02     | 5.06      | 3.22     | 10.00    | 8.70     | 3.00     | 4.00     | <1       | 2.00     | 3.00     | 3.50     | 3.50     |
| cis-chlordane                   | 2.97     | 4.99     | 6.70     | 14.26    | 12.31    | 8.55     | 1.62      | 1.81     | 17.00    | 6.70     | 1.40     | 2.00     | 1.00     | 1.00     | 1.60     | 11.00    | 11.00    |
| trans-chlordane                 | 1.28     | 2.09     | 5.43     | 3.82     | 2.98     | 3.18     | 1.36      | 1.23     | 2.40     | <1.5     | <1.1     | 1.00     | <0.8     | <0.9     | 1.80     | 3.90     | 3.90     |
| oxychlordane                    | 100.31   | 107.95   | 116.36   | 124.45   | 141.14   | 157.13   | 49.96     | 52.65    | 76.00    | 190.00   | 55.00    | 110.00   | 29.00    | 55.00    | 60.00    | 79.00    | 79.00    |
| cis-nonachlor                   | 4.03     | 7.84     | 6.90     | 10.62    | 11.34    | 17.96    | 3.54      | 3.78     | 11.00    | 6.90     | 4.10     | 4.00     | 2.00     | 1.00     | 2.50     | 8.30     | 8.30     |
| trans-nonachlor                 | 43.23    | 103.80   | 39.69    | 248.10   | 167.54   | 180.44   | 35.62     | 31.81    | 140.00   | 81.00    | 38.00    | 110.00   | 65.00    | 16.00    | 26.00    | 99.00    | 99.00    |
| nonachlor III                   | NA       | 32.00    | 28.00    | NA       | NA       | 32.00    | 14.00     | 15.00    | 39.00    | 65.00    | 16.00    | 37.00    | 13.00    | 17.00    | 19.00    | 29.00    | 29.00    |
| heptachlor epoxide              | 21.29    | 43.00    | 30.29    | 49.86    | 43.32    | 61.63    | 22.78     | 20.59    | 29.00    | 49.00    | 24.00    | 46.00    | 14.00    | 17.00    | 21.00    | 38.00    | 38.00    |
| 2,4'-DDD                        | 3.00     | <1.5     | 3.00     | <1.5     | <1.5     | <1.5     | <1.5      | <1.5     | <1.7     | <1.4     | <1.1     | <2       | <1       | <1       | <0.67    | <0.66    | <0.66    |
| 2,4'-DDE                        | <1.5     | <1.5     | 10.00    | <1       | <1       | <1.5     | <1.5      | <1.5     | <1.7     | <1.4     | <1.1     | <2       | <1       | <2       | <1       | <1       | <1       |
| 2,4'-DDT                        | <1.5     | <1.5     | 9.00     | 2.09     | <1.8     | <1.5     | <1.5      | <1.5     | 1.70     | <1.4     | <1.1     | <2       | <2       | <2       | 1.20     | 3.90     | 3.90     |
| 4,4'-DDD                        | 4.10     | 7.25     | 15.01    | 6.02     | 5.16     | 8.55     | 2.91      | 3.33     | 5.40     | 17.00    | 4.80     | 4.00     | <1       | 3.00     | 2.80     | 3.30     | 3.30     |
| 4,4'-DDE                        | 134.13   | 253.24   | 313.24   | 180.15   | 106.86   | 224.67   | 96.53     | 132.70   | 140.00   | 240.00   | 140.00   | 220.00   | 62.00    | 240.00   | 150.00   | 150.00   | 150.00   |
| 4,4'-DDT                        | 18.21    | 33.41    | 37.41    | 23.10    | 30.85    | 24.80    | 7.87      | 13.08    | 25.00    | 59.00    | 16.00    | 15.00    | 4.00     | 9.00     | 11.00    | 15.00    | 15.00    |
| dieldrin                        | 19.81    | 23.19    | 24.91    | 14.95    | 18.58    | 35.50    | 12.58     | 10.70    | 15.00    | 84.00    | 16.00    | 21.00    | 4.00     | 16.00    | 15.00    | 16.00    | 16.00    |
| mirex                           | 11.90    | 4.26     | 14.10    | 6.41     | 9.63     | 7.51     | 3.13      | 3.65     | 4.00     | 3.90     | 1.40     | 3.00     | <1       | 2.00     | 3.60     | 5.20     | 5.20     |

\*National Biomonitoring Specimen Bank operated by the National Institute of Standards and Technology

\*\*Not Available
